# Supplementary material for: Podocyte Injury in Diabetic Kidney Disease in Mouse Models Involves TRPC6-mediated Calpain Activation Impairing Autophagy
Source: PubMed Central journal article supplement — J Am Soc Nephrol. 2023 Sep 6;34(11):1823–42. doi: 10.1681/ASN.0000000000000212 (PMC10631601; doi:10.1681/asn.0000000000000212), 2023-09-06
Supplement: jasn-34-1823-s001.pdf [file jasn-34-1823-s001.pdf]

## **List of Supplemental Materials**

**Supplemental Figure 1: Autophagic flux assessment in type diabetes mellitus in mice.**

**Supplemental Figure 2: Validation of TRPC6 KD construction in MPC-5 podocytes.**

**Supplemental Figure 3: Biological parameters in mice with calpastatin overexpression.**

**Supplemental Figure 4: Pharmacological calpain-1 inhibition with BDA-410 or TRPC6 inhibition with BI-749327, prevent glomerulosclerosis in type II diabetes model.**

**Supplemental Figure 5: TRPC6 expression in diabetes models.**

**Supplemental figure 6: Pharmacological TRPC6 inhibition with BI-749327 prevents podocyte injury and restores glomerular autophagic flux in type I diabetes model.**

**Supplemental Figure 7: CAST expression, autophagic flux assessment and podocyte injury in patients with diabetic kidney disease.**

**Supplemental Figure 8: Single cell RNAseq database.**

**Supplemental Figure 9: Nephroseq transcriptomic database.**

**Supplemental Table 1: Patients characteristics.**

**Supplemental Table 2: Patients descriptive statistics.**

**Supplemental Table 3: Stainings descriptive statistics.**

**Supplemental Table 4: Analyses of variances for DKD and proteinuric patients.**

**Supplemental Table 5: Binomial logistic regression.**

**Supplemental Table 6: Model comparison.**

**Supplemental Table 7: Model coefficients.**

**Supplemental Table 8: Prediction with Model 4.**

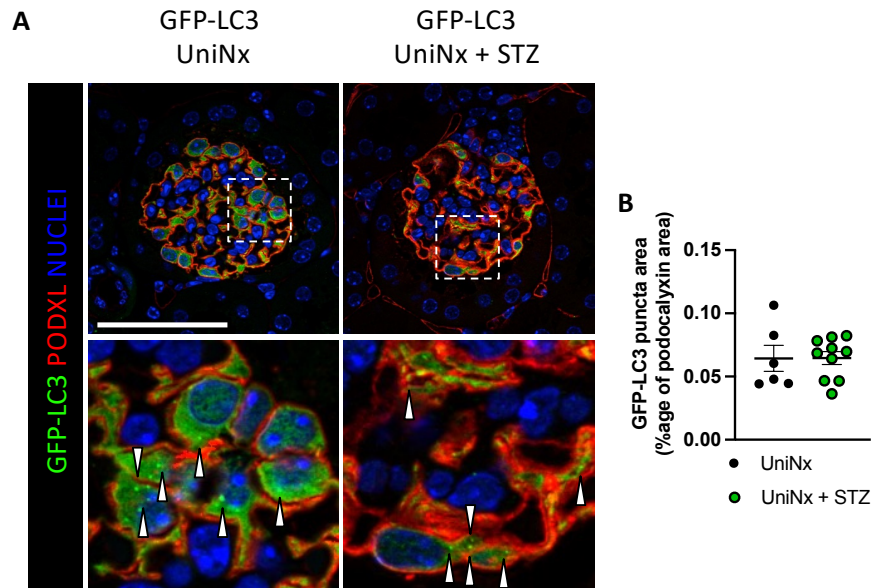

**Supplementary Figure 1: Autophagic flux assessment in type diabetes mellitus in mice. A.** Representative immunofluorescence of GFP-LC3 (green) and PODXL (red) expression in glomerulus from GFP-LC3 UniNx mice and GFP-LC3 UniNx +STZ mice. Nuclei are stained in blue with Hoechst. Scale bar: 50 $\mu$ m **B.** Quantification of GFP-LC3 punctiform area within PODXL area in type I diabetes model. n = 6 GFP-LC3 UniNx mice, n = 10 GFP-LC3 UniNx + STZ. Values are presented as individual plots and mean  $\pm$  SEM. Unpaired *t* test: NS, *p*>0.05.

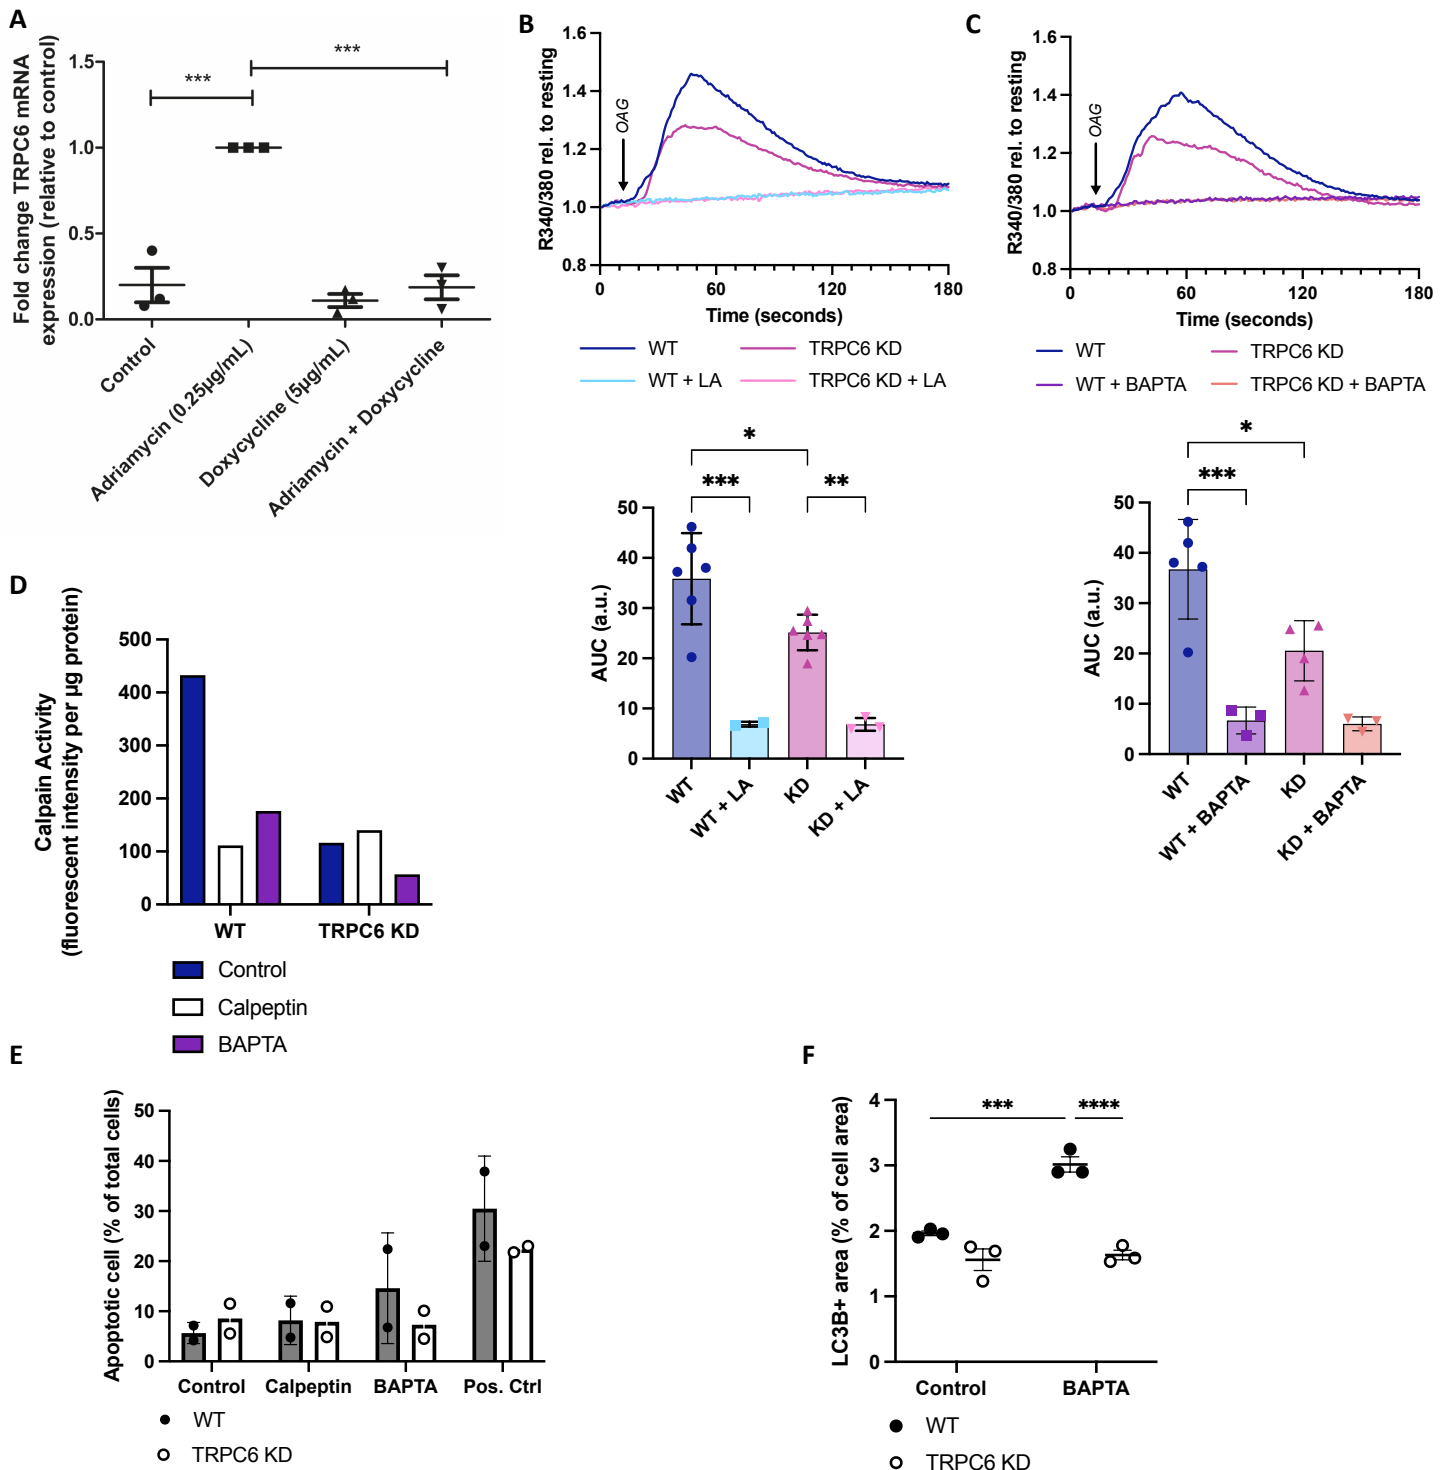

**Supplementary Figure 2: Validation of TRPC6 KD construction in MPC-5 podocytes.** (A) Fold change in *Trpc6* mRNA expression in MPC-5 podocytes expressing a tetracyclin-inducible TRPC6 shRNA construct. Adriamycin treatment induced *Trpc6* mRNA expression in podocytes not treated with doxycycline, whereas doxycycline-treated podocytes exhibit lower *Trpc6* mRNA expression with or without Adriamycin treatment. (B) OAG-mediated Ca<sup>2+</sup> response in WT and TRPC6 KD podocytes. Cells were treated or not with larixyl acetate (LA) as a positive control of TRPC6 blockade. One-way ANOVA:  $P < 0.0001$ . Tukey Post hoc test: WT vs. WT + LA,  $p = 0.0003$ ; WT vs. TRPC6 KD,  $p = 0.02$ ; TRPC6 KD vs. TRPC6 KD + LA,  $p = 0.0045$ . (C) OAG-mediated Ca<sup>2+</sup> response in WT podocytes treated or not with the Ca<sup>2+</sup> chelator BAPTA. One-way ANOVA:  $P = 0.0002$ . Tukey Post hoc test: WT vs. WT + BAPTA,  $p = 0.0004$ ; WT vs. TRPC6 KD,  $p = 0.02$ . (D) Calpain activity in WT podocytes treated or not with BAPTA or calpeptin. (E) Flow cytometry measurement of apoptosis in WT and TRPC6 KD podocytes after treatment with calpeptin or BAPTA. Staurosporin was used as a positive control of apoptosis. (F) Quantification of the LC3B+ puncta area in WT and TRPC6 KD podocytes treated or not with BAPTA. 2-way ANOVA: BAPTA effect,  $p = 0.0009$ ; TRPC6 KD effect,  $p < 0.0001$ . Post hoc Tukey test: WT vs. WT BAPTA,  $p = 0.0006$ ; WT BAPTA vs. TRPC6 BAPTA,  $p < 0.0001$

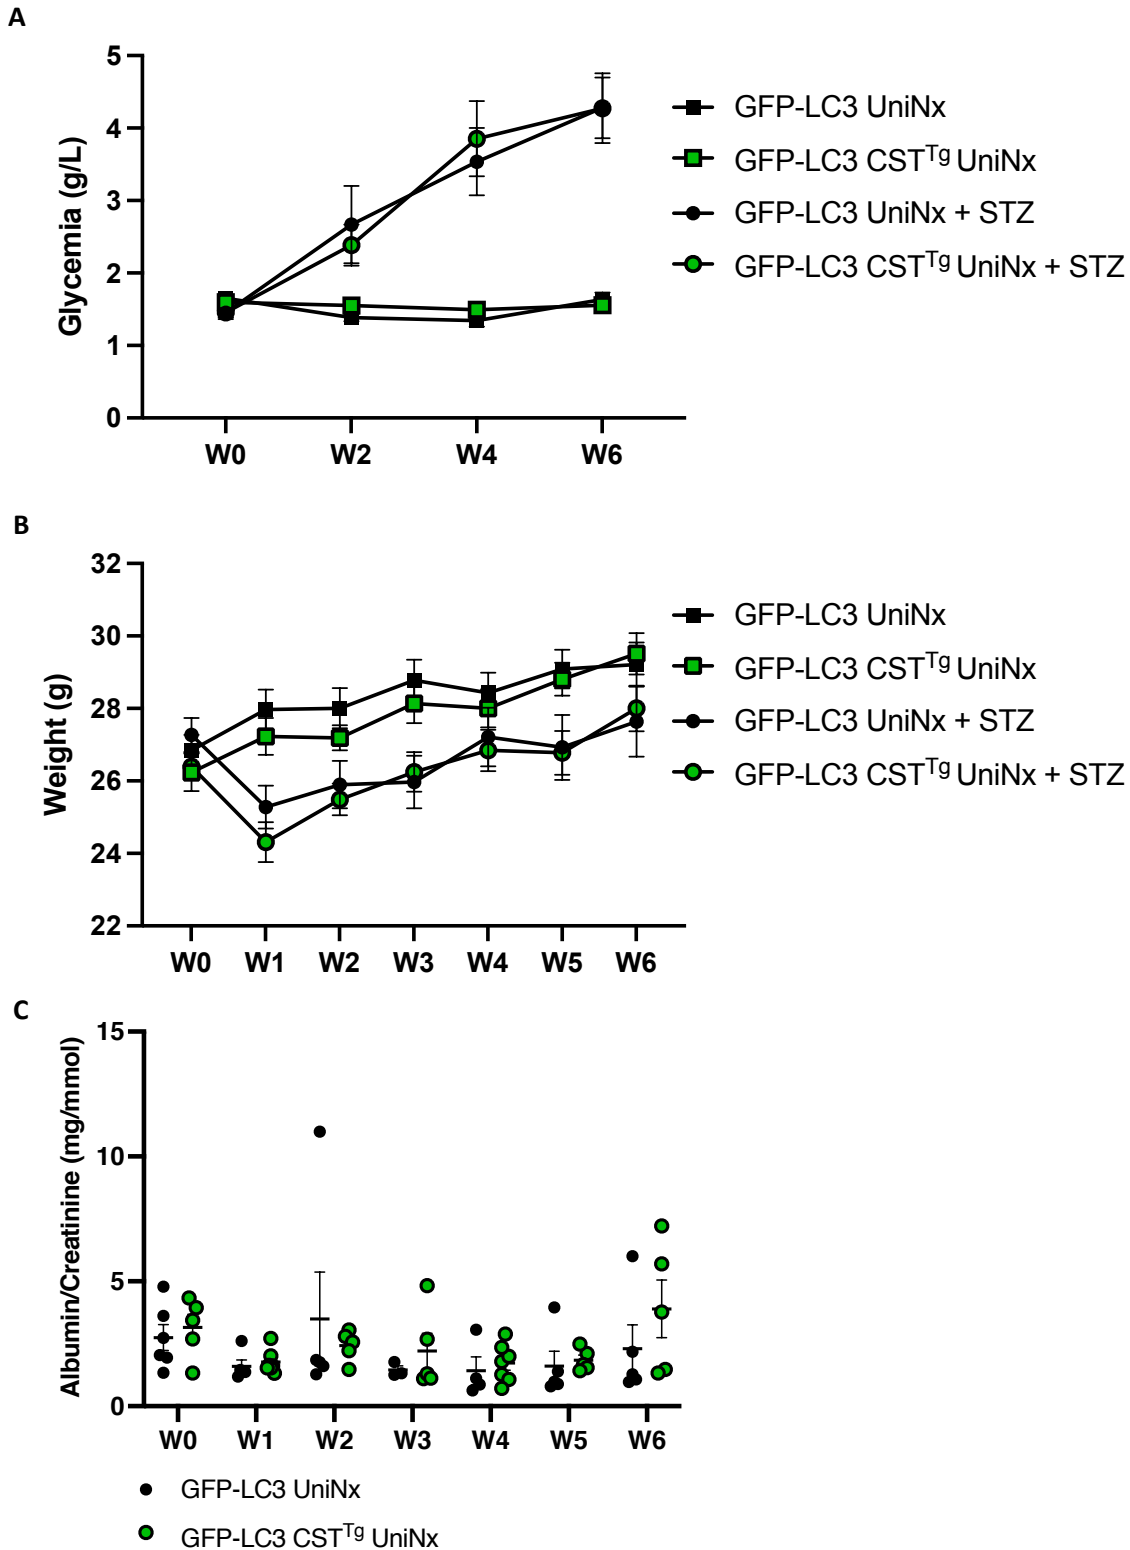

**Supplementary Figure 3: Biological parameters in mice with calpastatin overexpression. A.** Fed glycemia in GFP-LC3 UniNx and GFP-LC3 CST<sup>T<sup>g</sup></sup> UniNx after being injected or not with STZ. Values are presented as mean  $\pm$  SEM. **B.** Body mass of GFP-LC3 UniNx and GFP-LC3 CST<sup>T<sup>g</sup></sup> UniNx after being injected or not with STZ. Values are presented as mean  $\pm$  SEM. **C.** Evolution of the albumin-to-creatinine ratio in GFP-LC3 UniNx and GFP-LC3 CST<sup>T<sup>g</sup></sup> UniNx mice. Values are presented as individual plots and mean  $\pm$  SEM.

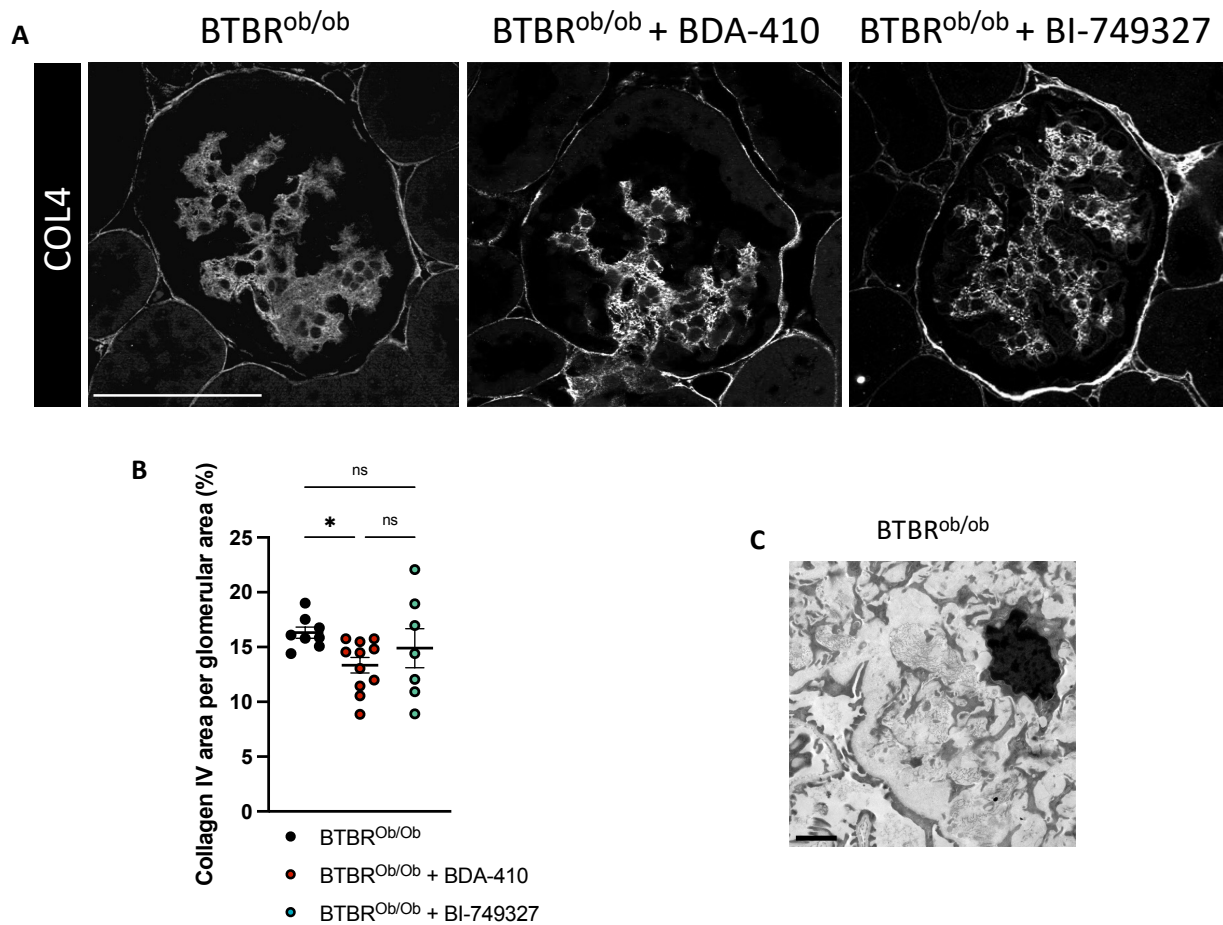

**Supplementary Figure 4: Pharmacological calpain-1 inhibition with BDA-410 or TRPC6 inhibition with BI-749327, prevent glomerulosclerosis in type II diabetes model. A.** Representative immunofluorescence of Collagen 4 expression in glomeruli from BTBR<sup>ob/ob</sup> mice treated or not with BDA-410 or BI-749327 for 6 weeks. **B.** Associated quantification. n =8 BTBR<sup>ob/ob</sup>, n =11 BTBR<sup>ob/ob</sup> + BDA-410, n=7 BI-749327. Values are presented as individual plots and mean  $\pm$  SEM. One-way ANOVA: p=0.1712. Fisher LSD post hoc test: BTBR<sup>ob/ob</sup> vs. BTBR<sup>ob/ob</sup> BDA-410, p= 0.04 **C.** Transmission electron microscopy images of mesangial cells showing fibrosis in BTBR<sup>ob/ob</sup> mice. Scale bar: 2 $\mu$ m.

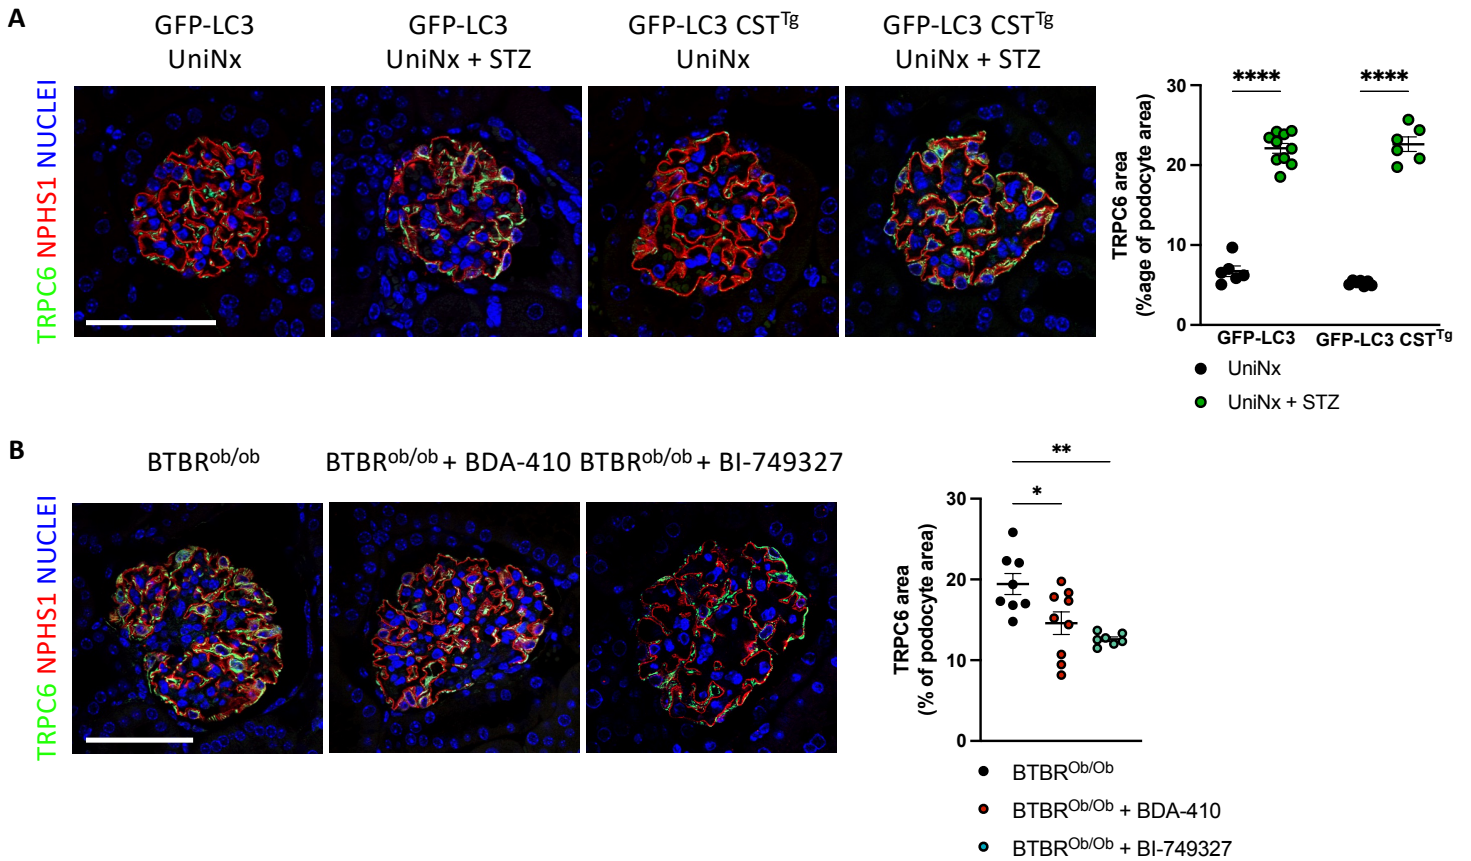

**Supplementary Figure 5: TRPC6 expression in diabetes models.** **A.** Representative immunofluorescence and associated quantification of TRPC6 (Green) and NPHS1 (red) expression in glomeruli from uni-nephrectomized (UniNx) GFP-LC3 and GFP-LC3 CST<sup>Tg</sup> mice treated or not with streptozotocin (+STZ). Nuclei are stained in blue with Hoechst. Scale bar: 50 $\mu$ m. Values are presented as individual plots and mean  $\pm$  SEM. Two-way analysis of variance: Genotype,  $p=0.5$ ; Treatment,  $p<0.0001$ . Tukey's test:  $p<0.0001$  for GFP-LC3 UniNx vs. GFP-LC3 UniNx + STZ and GFP-LC3 CST<sup>Tg</sup> UniNx vs. GFP-LC3 CST<sup>Tg</sup> UniNx + STZ. **B.** Representative immunofluorescence and associated quantification of TRPC6 (Green) and NPHS1 (red) expression in glomeruli from BTBR<sup>ob/ob</sup> mice treated or not with BDA-410 or BI-749327 for 6 weeks. Nuclei are stained in blue with Hoechst. Scale bar: 50 $\mu$ m. Values are presented as individual plots and mean  $\pm$  SEM. One-way analysis of variance: \*\*,  $p=0.002$ . Fisher LSD test: \*,  $p=0.019$  for BTBR<sup>ob/ob</sup> vs. BTBR<sup>ob/ob</sup> + BDA-410 and \*\*,  $p=0.002$  for BTBR<sup>ob/ob</sup> vs. BTBR<sup>ob/ob</sup> + BI-749327.



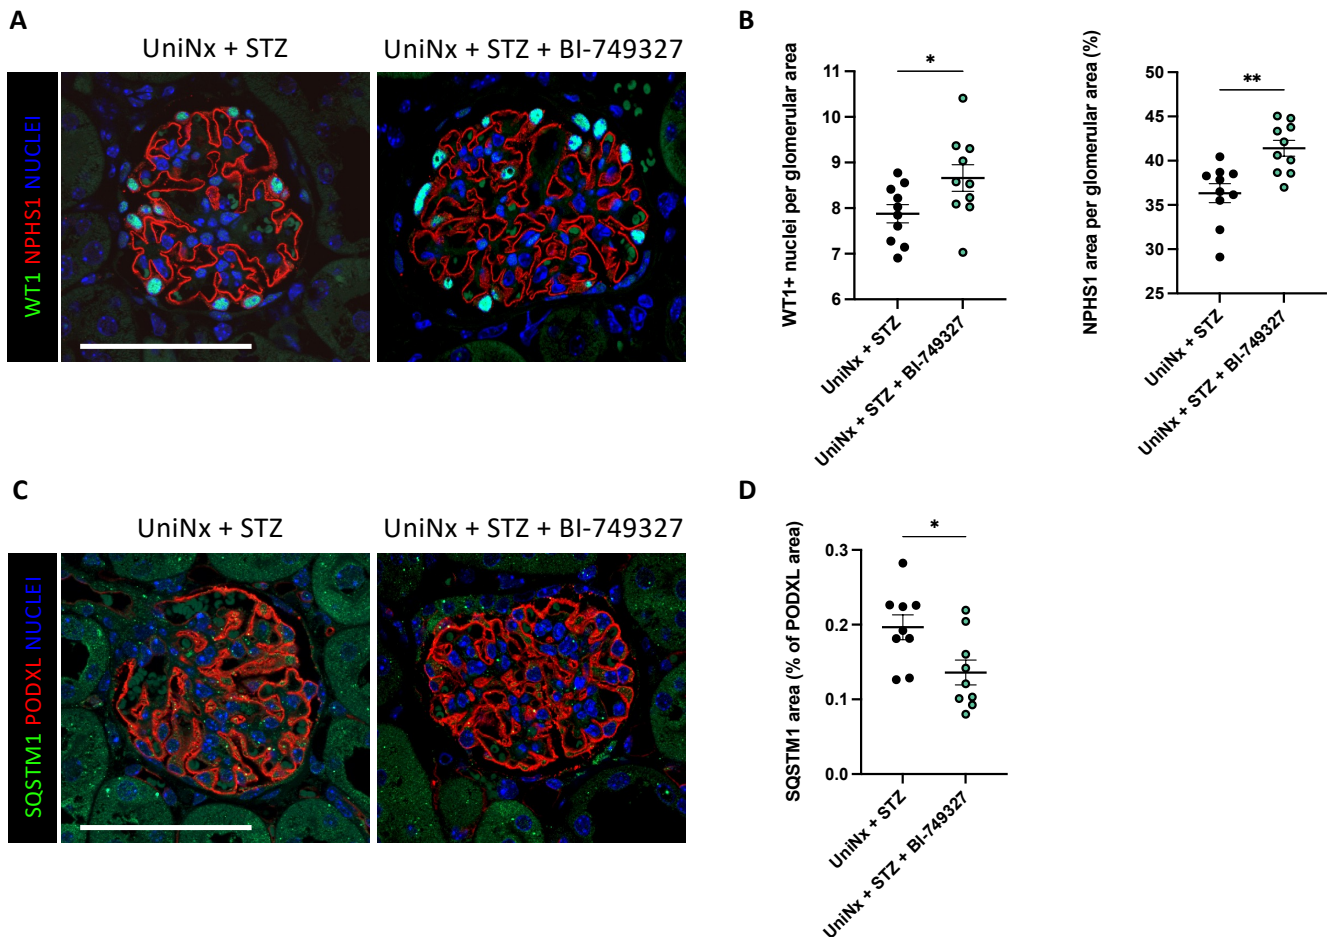

**Supplementary figure 6 : Pharmacological TRPC6 inhibition with BI-749327 prevents podocyte injury and restores glomerular autophagic flux in type I diabetes model. A.** Representative immunofluorescence of WT1 (Green) and NPHS1 (Red) expression in glomeruli from C57B6J mice UniNx 6 weeks after being injected with STZ and treated or not with BI-749327. Nuclei are stained in blue with Hoechst. **B.** Quantification of the number of WT1+ nuclei and NPHS1 area per glomerular area.  $n = 10$  UniNx + STZ,  $n = 10$  UniNx + STZ + BI-749327. Values are represented as individual plots and mean  $\pm$  SEM. Unpaired t test: For WT1  $*p=0.0401$ , for NPHS1  $**p=0.0019$ . **C.** Representative immunofluorescence of SQSTM1 (Green) and PODXL (Red) expression in glomeruli from C57B6J mice UniNx after being injected with STZ and treated or not with BI-749327. Nuclei are stained in blue with Hoechst. **D.** Quantification of SQSTM1 area in PODXL area  $n = 10$  UniNx + STZ,  $n = 10$  UniNx + STZ + BI-749327. Values are represented as individual plots and mean  $\pm$  SEM. Unpaired t test: For SQSTM1  $*p=0.0202$ .

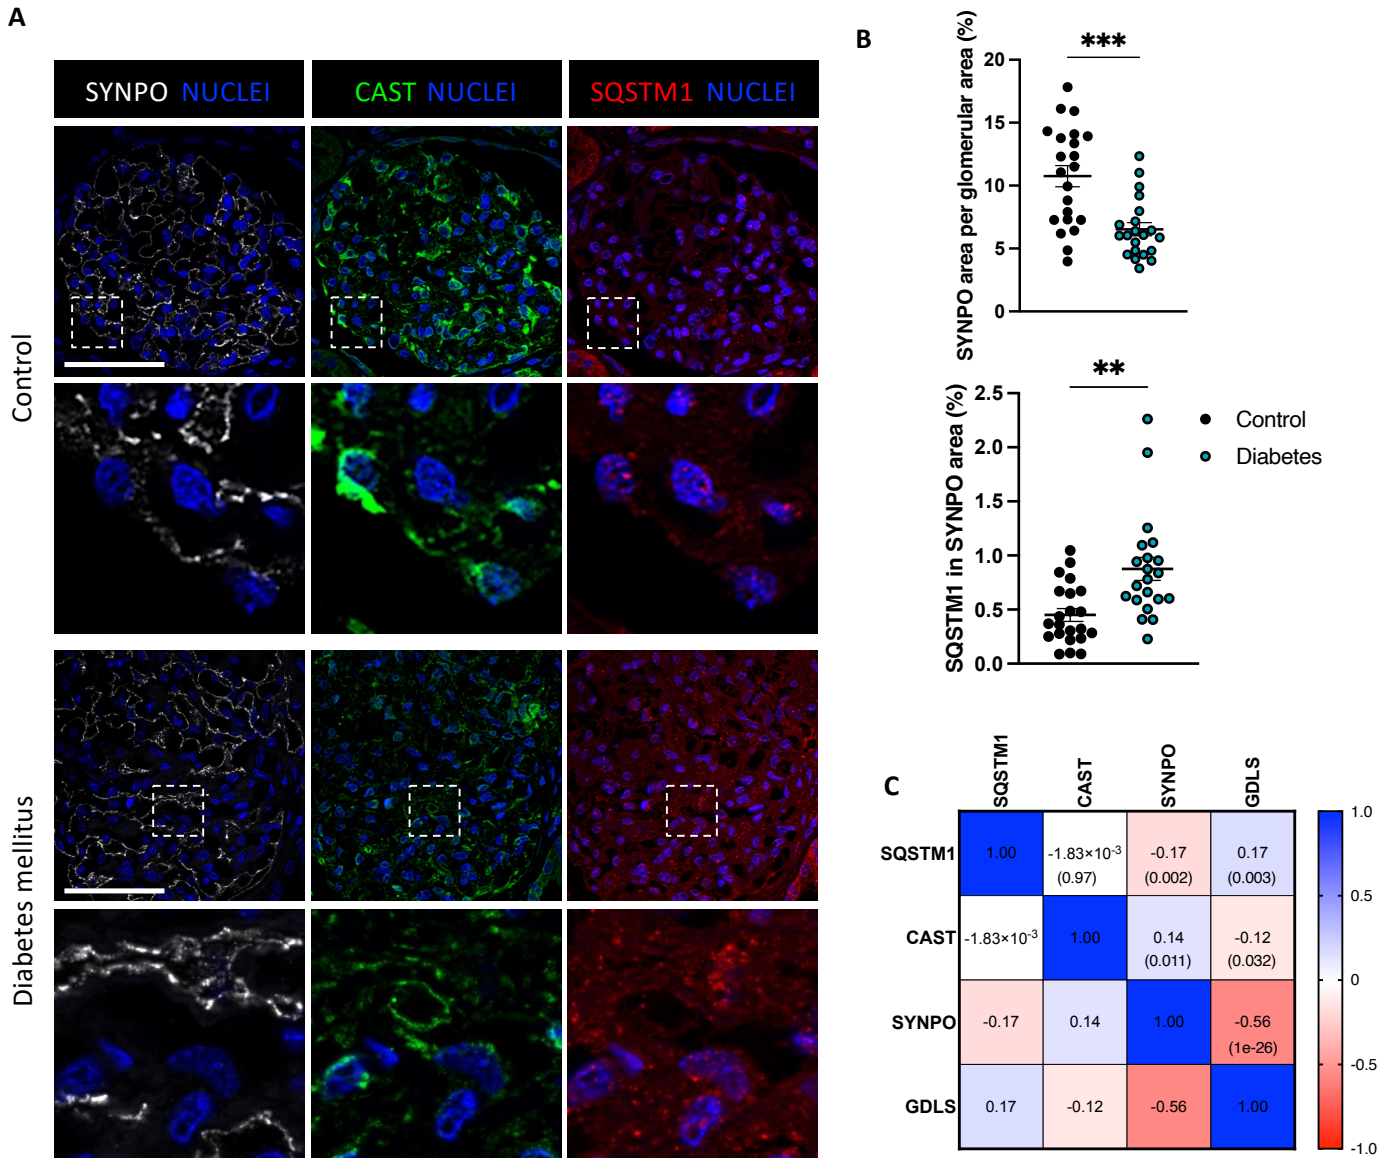

**Supplementary Figure 7: CAST expression, autophagic flux assessment and podocyte injury in patients with diabetic kidney disease. A.** Representative immunofluorescence of SYNPO (white), CAST (green), and SQSTM1 (red) expression in glomerulus from control and diabetic patients. Nuclei are stained in blue with Hoechst. Scale bar: 50 $\mu$ m **B.** Quantifications of SYNPO and SQSTM1 expressions. Values are presented as individual plots of each patient and mean  $\pm$  SEM. \*\*  $p < 0.01$ , \*\*\*  $p < 0.001$ . **C.** Correlation matrix of the glomerular areas of SQSTM1, CAST, SYNPO and the glomerular diabetic lesion score (GDLS) in patients by individual glomerular staining. Numbers in squares represent: Pearson's r (p value).



**A**

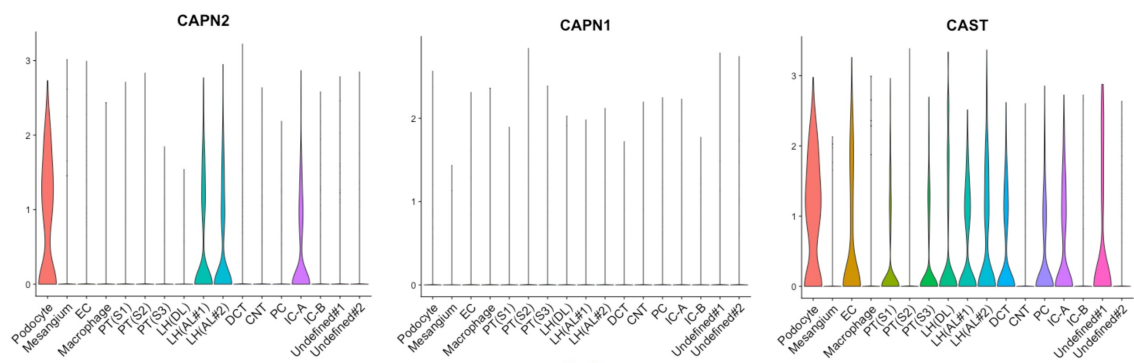

**B**

| RNAseq   | cluster name | cell count in cluster | median expression | cells expressing (%) | fold change | p value   | adjust p value | gene  |
|----------|--------------|-----------------------|-------------------|----------------------|-------------|-----------|----------------|-------|
| scRNAseq | Podocyte     | 118                   | 5.13              | 72.9                 | 2.61        | 0         | 0              | NPHS1 |
|          |              |                       | 0.186             | 19%                  | 0.53        | 5.90e-52  | NS             | TRPC6 |
|          |              |                       | 0.831             | 83%                  | 1.74        | 8.33e-43  | NS             | CAPN2 |
|          |              |                       | 0.203             | NS                   | NS          | NS        | NS             | CAPN1 |
|          |              |                       | 0.661             | 66.1%                | 1.02        | 8.58e-18  | NS             | CAST  |
| snRNAseq | Podocyte     | 1028                  | 19.3              | 94.2%                | 4.19        | 0         | 0              | NPHS1 |
|          |              |                       | 2.09              | 47.8%                | 1.46        | 9.79e-192 | 2.91e-187      | TRPC6 |
|          |              |                       | 3.39              | 73.0%                | 1.18        | 4.80e-141 | 1.43e-136      | CAPN2 |
|          |              |                       | 0.232             | NS                   | NS          | NS        | NS             | CAPN1 |
|          |              |                       | 2.87              | 66.9%                | 0.474       | 2.20e-36  | 6.55e-32       | CAST  |

**Supplementary Figure 8: Single cell RNAseq database. A.** Expression of CAPN2, CAPN1 and CAST in single cell RNAseq from the Kidney Interactive Transcriptomics public database. **B.** Expression of NPHS1, TRPC6, CAPN2, CAPN1 and CAST in single cell and single nuclei RNAseq from the KPMP public database.

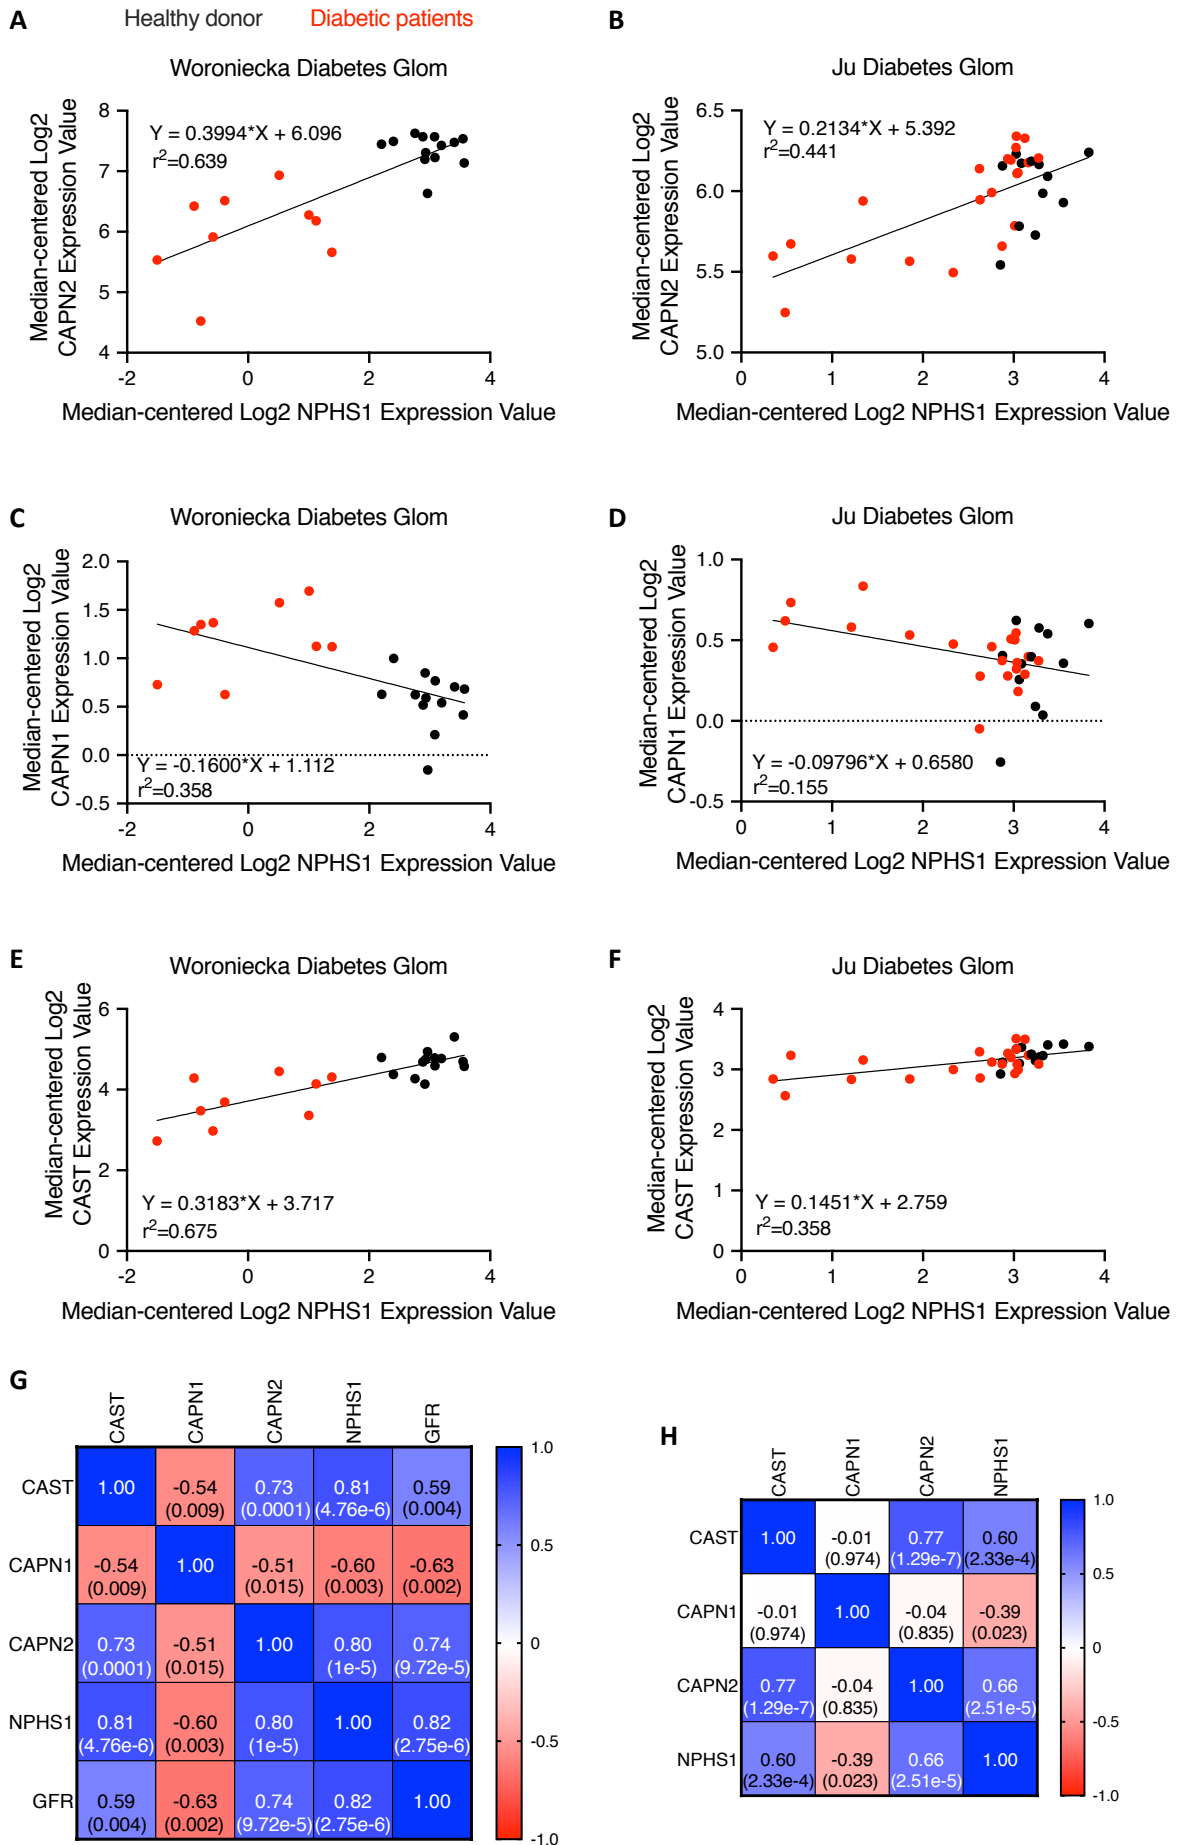

**Supplementary Figure 9: Nephroseq transcriptomic database.** Expression of CAPN2 (A-B), CAPN1 (C-D) and CAST (E-F) in glomeruli from the Woroneicka Diabetes Glom (A, C, E) and the Ju diabetes Glom (B, D, F) database. G-H. Correlation matrix of the expression of CAST, CAPN1, CAPN2, NPHS1 (and the GFR for G) in the Woroneicka Diabetes Glom (G) and the Ju diabetes Glom (H) database.

| Gender | Age (years) | Creat (umol/L) | UPCR (g/mmol) | UACR (mg/mmol) | eGFR (mL/min) | Patients                               | Patient group | Diabetes | ID  |
|--------|-------------|----------------|---------------|----------------|---------------|----------------------------------------|---------------|----------|-----|
| F      | 48          | 90             | 0.012         | 2.4            | 59            | Renal Transplant Routine Biopsy (RTRB) | Control       |          | C1  |
| M      | 63          | 148            | 1.737         | 1116           | 31            | Diabetic Kidney Disease (DKD)          | DKD           | T2 DM    | D1  |
| M      | 48          | 166            | 0.06          | 12             | 39            | RTRB                                   | Control       |          | C2  |
| F      | 32          | 91             | 0.13          | 6.1            | 62            | RTRB                                   | Control       |          | C3  |
| M      | 61          | 326            | 0.039         |                | 17            | DKD                                    | DKD           | T2 DM    | D2  |
| M      | 49          | 70             | 0.058         | 46.5           | 103           | DKD                                    | DKD           | T2 DM    | D3  |
| M      | 65          | 141            | 0.017         | 3              | 44            | RTRB                                   | Control       |          | C4  |
| F      | 56          | 446            | 1.81          | 928            | 9             | DKD                                    | DKD           | T2 DM    | D4  |
| M      | 64          | 115            | 0.21          | 38.5           | 56            | RTRB                                   | Control       | Diabetes | C5  |
| M      | 77          | 147            | 0.021         | 8              | 40            | RTRB                                   | Control       |          | C6  |
| F      | 46          | 80             | 0.004         | 1              | 76            | RTRB                                   | Control       |          | C7  |
| M      | 70          | 357            | 0.688         | 444            | 15            | DKD                                    | DKD           | T2 DM    | D5  |
| M      | 65          | 119            | 0.67          | 584            | 53            | DKD                                    | DKD           | T2 DM    | D6  |
| F      | 42          | 90             | 0.013         | 1.5            | 85            | RTRB                                   | Control       |          | C8  |
| M      | 77          | 339            | 0.451         | 364.2          | 15            | DKD                                    | DKD           | T2 DM    | D7  |
| F      | 46          | 104            | 0.011         | 0.9            | 49            | RTRB                                   | Control       |          | C9  |
| M      | 67          | 77             | 0.39          | 44             | 88            | DKD                                    | DKD           | T2 DM    | D8  |
| M      | 61          | 846            | 0.772         | 545            | 6             | DKD                                    | DKD           | T2 DM    | D9  |
| M      | 71          | 870            | 0.4           | 243            | 5             | DKD                                    | DKD           | T2 DM    | D10 |
| M      | 60          | 150            | 0.036         | 6.8            | 40            | RTRB                                   | Control       |          | C10 |
| M      | 47          | 146            | 1.25          | 750            | 45            | DKD                                    | DKD           | T2 DM    | D11 |
| F      | 39          | 96             | 0.043         | 0              | 56            | RTRB                                   | Control       |          | C11 |
| M      | 64          | 113            | 0.015         | 0              | 57            | RTRB                                   | Control       |          | C12 |
| F      | 34          | 200            | 0.03          | 11.2           | 27            | DKD                                    | DKD           | T1 DM    | D12 |
| F      | 30          | 76             | 0.012         | 0.5            | 78            | RTRB                                   | Control       |          | C13 |
| F      | 60          | 93             | 0.019         | 3.9            | 53            | RTRB                                   | Control       |          | C14 |
| F      | 61          | 60             | 0.011         | 0              | 95            | RTRB                                   | Control       |          | C15 |
| F      | 69          | 147            | 0.141         | 69             | 31            | DKD                                    | DKD           | T2 DM    | D13 |
| M      | 56          | 100            | 0.043         | 0              | 67            | RTRB                                   | Control       |          | C16 |
| M      | 38          | 453            | 0.931         | 578.7          | 17            | DKD                                    | DKD           | T1 DM    | D14 |
| F      | 20          | 82             | 0.008         | 3              | 89            | RTRB                                   | Control       |          | C17 |
| F      | 55          | 126            | 0.034         | 4.7            | 38            | RTRB                                   | Control       | Diabetes | C18 |
| F      | 40          | 161            | 0.012         | 1              | 43            | RTRB                                   | Control       |          | C19 |
| M      | 69          | 300            | 0.027         | 18.3           | 18            | DKD                                    | DKD           | T2 DM    | D15 |
| M      | 55          | 190            | 0.974         | 717            | 33            | DKD                                    | DKD           | T2 DM    | D16 |
| M      | 31          | 97             | 0.013         | 0              | 89            | RTRB                                   | Control       |          | C20 |
| M      | 72          | 304            | 0.733         | 543.8          | 18            | DKD                                    | DKD           | T2 DM    | D17 |
| F      | 50          | 395            | 0.503         | 315.9          | 14            | DKD                                    | DKD           | T2 DM    | D18 |
| M      | 64          | 312            | 0.023         | 13.3           | 18            | DKD                                    | DKD           | T2 DM    | D19 |
| F      | 68          | 164            | 0.248         | 169.5          | 27            | DKD                                    | DKD           | T2 DM    | D20 |
| F      | 70          | 519            | 0.672         | 379            | 7             | DKD                                    | DKD           | T2 DM    | D21 |
| F      | 23          | 92             | 0.011         | 2.9            | 66            | RTRB                                   | Control       |          | C21 |
| F      | 43          | 61             | 0.101         | 54.2           | 93            | Uncharacterized proteinuria            | PROT          |          | P2  |
| M      | 57          | 216            | 0.036         | 22             | 27            | Uncharacterized proteinuria            | PROT          |          | P3  |
| F      | 73          | 115            | 0.008         | 2              | 41            | Uncharacterized proteinuria            | PROT          |          | P4  |
|        | 53          | 104            | 0.41          | 291            | 65            | DKD                                    | DKD           | T2 DM    | D22 |
| M      | 64          | 132            | 0.119         | 101.3          | 47            | Membranous Nephropathy (MN)            | PROT          |          | P5  |
| F      |             | 55             | 0.368         | 280            | 97            | MN                                     | PROT          |          | P6  |
| F      |             | 95             | 0.7           | 595            | 55            | MN                                     | PROT          |          | P7  |
| M      | 51          | 178            | 0.107         | 82.6           | 35            | MN                                     | PROT          |          | P8  |
| M      | 46          | 488            | 0.772         | 509.2          | 11            | MN                                     | PROT          |          | P9  |
|        | 69          | 215            | 0.709         | 590            | 26            | MN                                     | PROT          |          | P10 |
| M      | 30          | 74             | 0.331         | 323            | 108           | MN                                     | PROT          |          | P11 |
| M      | 52          | 73             | 0.45          | 420            | 98            | MN                                     | PROT          |          | P12 |
| F      | 31          | 66             | 0.116         | 94.4           | 91            | MN                                     | PROT          |          | P13 |
| F      | 49          | 88             | 0.153         | 0.11           | 59            | MN                                     | PROT          |          | P14 |
| F      |             | 78             | 0.412         | 335            | 75            | Minimal Change Disease (MCD)           | PROT          |          | P15 |
| M      | 50          | 138            | 1.018         | 727.6          | 47            | MCD                                    | PROT          |          | P16 |
| M      | 43          | 94             | 0.44          | 295            | 81            | MCD                                    | PROT          |          | P17 |
| M      | 54          | 83             | 0.804         | 226            | 66            | MCD                                    | PROT          |          | P18 |
| F      | 22          | 52             | 0.7           | 700            | 120           | MCD                                    | PROT          |          | P19 |
| M      | 26          | 130            | 1.01          | 802            | 58            | MCD                                    | PROT          |          | P20 |
| M      | 29          | 74             | 0.989         | 728            | 119           | MCD                                    | PROT          |          | P21 |
| M      | 38          | 172            | 0.613         | 1400           | 38            | MCD                                    | PROT          |          | P22 |

**Supp Table 1: Patients characteristics**

Descriptives

|                 | disease | Age (years) | BMI (kg/m <sup>2</sup> ) | UACR (mg/mmol) | eGFR (mL/min) |
|-----------------|---------|-------------|--------------------------|----------------|---------------|
| N               | Control | 21          | 19                       | 21             | 21            |
|                 | DKD     | 22          | 20                       | 21             | 22            |
|                 | PROT    | 21          | 20                       | 21             | 21            |
| Mean            | Control | 48.0        | 24.2                     | 4.58           | 61.0          |
|                 | DKD     | 60.4        | 28.1                     | 389            | 30.1          |
|                 | PROT    | 47.3        | 26.5                     | 400            | 66.3          |
| Std. error mean | Control | 3.34        | 0.934                    | 1.83           | 3.98          |
|                 | DKD     | 2.43        | 0.930                    | 69.5           | 5.57          |
|                 | PROT    | 3.12        | 0.888                    | 75.7           | 7.00          |

**Supp Table 2: Patients descriptive statistics**

Descriptives

|                 | disease | SQSTM1 | TRPC6 | SYNPO | CAST  |
|-----------------|---------|--------|-------|-------|-------|
| N               | Control | 19     | 19    | 19    | 21    |
|                 | DKD     | 21     | 21    | 21    | 21    |
|                 | PROT    | 21     | 21    | 21    | 21    |
| Mean            | Control | 0.522  | 3.51  | 14.9  | 4.87  |
|                 | DKD     | 1.17   | 6.82  | 7.12  | 4.02  |
|                 | PROT    | 0.713  | 5.57  | 10.3  | 5.68  |
| Std. error mean | Control | 0.0853 | 0.399 | 1.01  | 0.404 |
|                 | DKD     | 0.0914 | 0.662 | 0.845 | 0.363 |
|                 | PROT    | 0.0330 | 0.275 | 0.618 | 0.399 |

**Supp Table 3: Stainings descriptive statistics.** DKD: diabetic kidney disease, PROT: proteinuric disease

Kruskal-Wallis

|                          | $\chi^2$ | df | p     | $\epsilon^2$ |
|--------------------------|----------|----|-------|--------------|
| Age (years)              | 8.5937   | 1  | 0.003 | 0.2261       |
| BMI (kg/m <sup>2</sup> ) | 0.8359   | 1  | 0.361 | 0.0232       |
| UACR (mg/mmol)           | 0.0235   | 1  | 0.878 | 6.53e-4      |
| eGFR (mL/min)            | 10.4373  | 1  | 0.001 | 0.2747       |
| TRPC6                    | 1.4885   | 1  | 0.222 | 0.0363       |
| SYNPO                    | 8.1520   | 1  | 0.004 | 0.1988       |
| SQSTM1                   | 13.3059  | 1  | <.001 | 0.3245       |
| CAST                     | 6.6485   | 1  | 0.010 | 0.1622       |

**Supp Table 4: Analyses of variances for DKD and proteinuric patients.** Non parametric Kruskal-Wallis analyses of variances. BMI: body mass index, UACR: urinary-to-creatinine ratio, eGFR: estimated glomerular filtration rate.

Model Fit Measures

| Model | Deviance | BIC  | R <sup>2</sup> <sub>N</sub> |
|-------|----------|------|-----------------------------|
| 1     | 48.5     | 55.9 | 0.246                       |
| 2     | 42.5     | 53.6 | 0.393                       |
| 3     | 32.1     | 46.9 | 0.605                       |
| 4     | 30.0     | 48.5 | 0.641                       |

**Supp Table 5: Binomial logistic regression.** Comparison of models. Model 1: dependent variable= SYNPO, Model 2: dependent variables= SYNPO + CAST, Model 3: dependent variables= SYNPO + CAST + SQSTM1, Model 4: dependent variables= SYNPO + CAST + SQSTM1 + TRPC6 . BIC: Bayesian Information Criterion, R<sup>2</sup><sub>N</sub> Nagelkerke's R<sup>2</sup>.

| Comparison |       |                |    |       |
|------------|-------|----------------|----|-------|
| Model      | Model | χ <sup>2</sup> | df | p     |
| 1          | - 2   | 5.96           | 1  | 0.015 |
| 2          | - 3   | 10.45          | 1  | 0.001 |
| 3          | - 4   | 2.08           | 1  | 0.149 |

**Supp Table 6: Model comparison.**

| Predictor | Estimate | SE    | Z      | p     |
|-----------|----------|-------|--------|-------|
| Intercept | 1.976    | 3.001 | 0.658  | 0.510 |
| SYNPO     | 0.211    | 0.146 | 1.443  | 0.149 |
| CAST      | 0.580    | 0.330 | 1.755  | 0.079 |
| SQSTM1    | -4.751   | 2.161 | -2.199 | 0.028 |
| TRPC6     | -0.418   | 0.324 | -1.288 | 0.198 |

**Supp Table 7: Model coefficients.** Estimate represents the log odds of disease = PROT vs. Disease = DKD

| Observed | Predicted |      | % Correct |
|----------|-----------|------|-----------|
|          | DKD       | PROT |           |
| DKD      | 17        | 3    | 85.0      |
| PROT     | 4         | 17   | 81.0      |

**Supp Table 8: Prediction with Model 4.** Cut-off value =0.6
